# Supplementary material for: Highly efficient visible-light-driven plasmonic photocatalysts based on graphene oxide-hybridized one-dimensional Ag/AgCl heteroarchitectures
Source: Royal Society of Chemistry journal article supplement (doi:10.1039/c2jm34938h), 2012-01-01
Supplement: c2jm34938h.pdf [file c2jm34938h.pdf]

## Electronic Supplementary Information

### Highly Efficient Visible–Light–Driven Plasmonic Photocatalysts Based on Graphene Oxide Hybridized One–Dimensional Ag/AgCl Heteroarchitectures

Mingshan Zhu, Penglei Chen,\* and Minghua Liu\*

*Beijing National Laboratory for Molecular Science, CAS Key Laboratory of Colloid, Interface and  
Chemical Thermodynamics, Institute of Chemistry, Chinese Academy of Sciences, No. 2 Zhongguancun  
Beiyijie, Beijing 100190, P. R. China. Fax: (+) 86-10-62569564; Tel: (+) 86-10-82615803.*

*E-mail: [chenpl@iccas.ac.cn](mailto:chenpl@iccas.ac.cn); [liumh@iccas.ac.cn](mailto:liumh@iccas.ac.cn)*

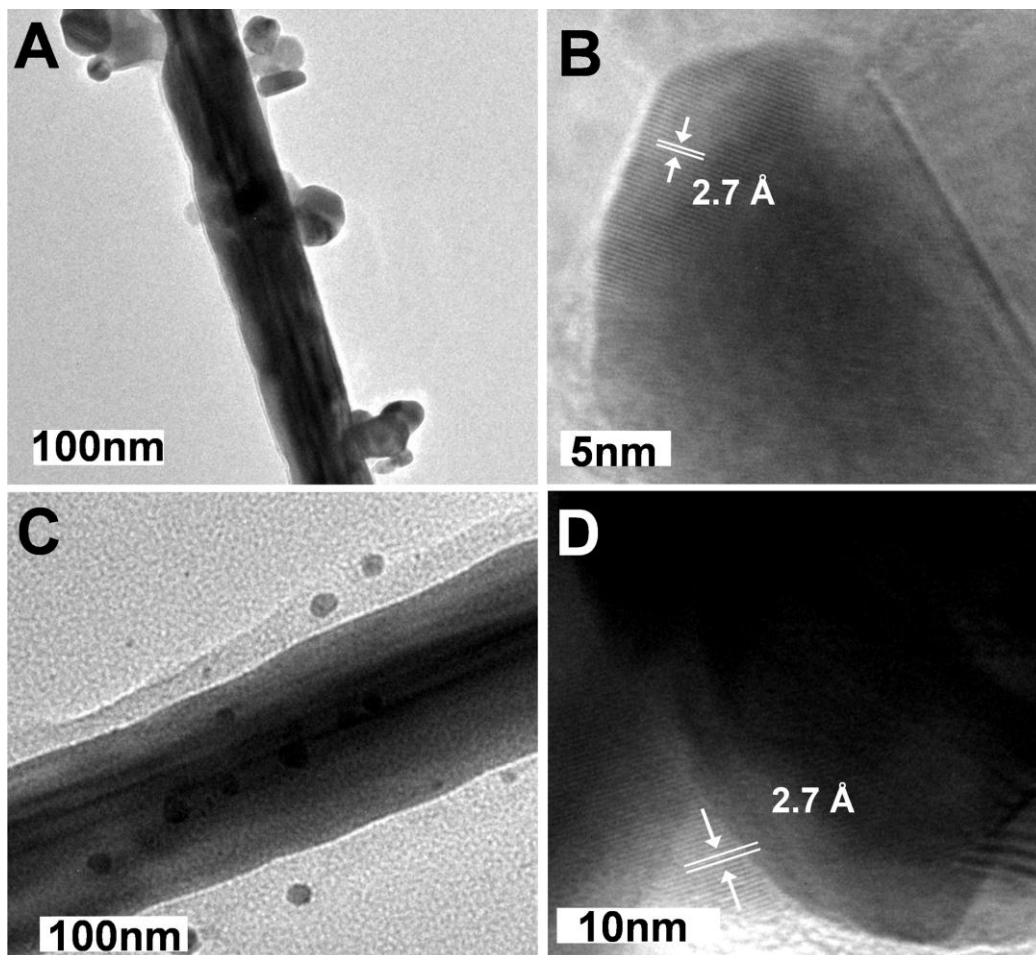

**Fig. S1.** LRTEM images (A and C) of the 1D Ag/AgCl (A) and Ag/AgCl/GO (C) nanostructures, and HRTEM images (B and D) of the AgCl nanoparticles loaded on Ag/AgCl (B) and Ag/AgCl/GO (D) nanospecies.

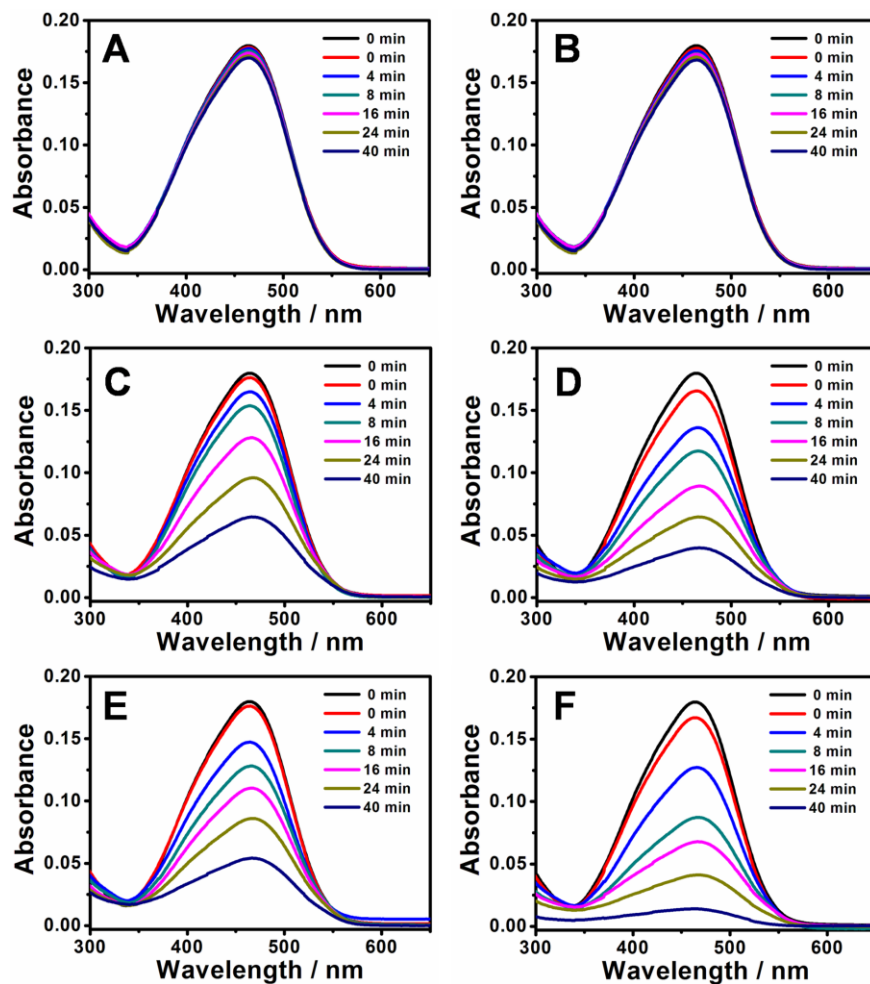

**Fig. S2.** Real-time absorption spectra of MO dye during the photodegradation process over various Ag/AgCl-based photocatalysts under visible light illumination. The employed catalysts for (A), (B), (C), (D), (E) and (F) are the parent bare 1D Ag nanowires, commercial available P25-TiO<sub>2</sub>, spherical Ag/AgCl and Ag/AgCl/GO nanoparticles, 1D Ag/AgCl and Ag/AgCl/GO nanospecies, respectively. The black and red curves marked as 0 min in each panel are the absorption spectra detected from the original MO solution before (black) and after (red) the dark adsorption experiment, respectively.

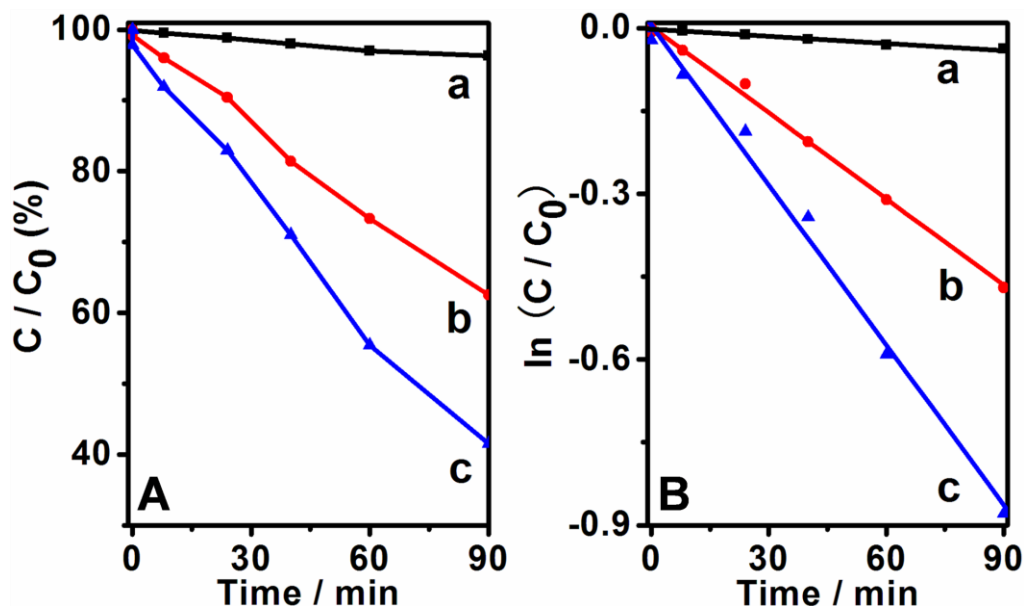

**Fig. S3.** Photocatalytic activities (A) and kinetic linear simulation curves (B) of the as-prepared plasmonic photocatalysts for the photodegradation of 4-CP pollutant under visible-light irradiations ( $>400$  nm). The employed catalysts for curve (a), (b), and (c) are the parent bare 1D Ag nanowires, 1D Ag/AgCl heterostructures, and 1D Ag/AgCl/GO heterostructures, respectively. The catalytic performance was monitored by measuring the absorbance at a wavelength of 280 nm of 4-CP.

As shown in Fig. S3A, when the parent bare 1D Ag nanowires were used as the photocatalysts, no more than 4% of 4-CP molecules were decomposed within 90 minutes. In contrast, when our present 1D Ag/AgCl nanostructures were employed as the photocatalysts, ca. 37.5% of 4-CP molecules were photodecomposed under the similar experimental conditions. Importantly, when the 1D Ag/AgCl/GO heterostructures were used as the photocatalysts, about 58.5% of 4-CP pollutants were decomposed. Furthermore, as shown in Fig. S3B, it can be seen that the rate constant of the 1D Ag/AgCl/GO heterostructures was determined to be  $0.0097 \text{ min}^{-1}$ , which were distinctly higher than that of the 1D Ag/AgCl nanospecies ( $0.0052 \text{ min}^{-1}$ ). These results are essentially similar to what we have observed from the photodegradation of MO described in the main context, further suggesting that the photocatalytic performance of our 1D Ag/AgCl nanomaterials could be further enhanced *via* the hybridization of GO nanosheets, and that our 1D Ag/AgCl/GO hybridized nanostructures could be used as efficient visible-light-driven plasmonic photocatalysts for the photodegradation of organic pollutants.
